# Supplementary material for: Upper-rim monofunctionalization of calix[4]arene by organometallic diphenylphosphinorhodium complexes
Source: Royal Society of Chemistry journal article supplement (doi:10.1039/b001485k), 2000-01-01
Supplement: b001485k.doc [file b001485k.doc]

# ESI

Upper-rim Monofunctionalization of Calix[4]arene by Organomettalic Diphenylphosphinorhodium Complexes.

Martin Vézina, Jonathan Gagnon, Karine Villeneuve, Marc Drouin, Pierre D. Harvey*.

**5-diphenylphosphino-25,26,27,28-tetra-*n*-propoxylcalix[4]arene,** **2**. 3.0g (4.5mmo1) of **1**, was placed in a flame dried 100ml flask. Then 20 ml of dry THF was transfered into the flask under N2. The reaction mixture was cooled down to -78C (acetone-dry ice) and 0.29g (4.5mmol) of *t*-buthyllithium in solution in hexane was added. After 1h of reaction, 0.98ml (5.4mmol) of ClPPh2 was added to the solution using a syringe and the solution was stirred for 10 hrs at the same temperature. The solution was then allowed to warm up to room temperature and evaporated down until an oily residue appeared. The crude product was then purified by column chromatography using a 20:80 CH2Cl2/hexane mixture. A white solid was obtained. Yield 2.0g (60 %). H NMR (300MHz, CDCl3) 7.31-7.26 (m, 6H, Ar-H), 7.19-7.13 (m, 4H, Ar-H), 6.75 (d, 2H, 3JH-H=7.26, Ar-H), 6.69- 6.63 (m, 5H, Ar-H), 6.58-6.48 (m, 4H, Ar-H), 4.49 (d, 2H, 2JH-H=13.58, Ar-CH2), 4.44 (d, 2H, 2JH-H=13.67, Ar-CH2), 3.91-3.85 (m, 8H, O-CH2), 3.20 (d, 2H, 2JH-H=13.20, Ar-CH2), 3.08 (d, 2H, 2JH-H=13.16, Ar-CH2), 2.01-1.91 (m, 8H, CH2-CH3), 1.05-0.98 (m, 12H, CH2-CH3). C NMR (CDCl3) 157.20, 156.25, 138.10, 135.16, 134.95, 134.59, 133.74, 133.49, 133.26, 128.49, 128.10, 122.09, 121.98, 76.80, 76.62, 30.87, 30.74, 23.17, 10.27. P NMR (CDCl3) -3.96. IE 776 (M+). Calc. for C52H57O4P: C, 80.38; H, 7.39. Found:  C, 80.17; H, 7.64.

**Dichloro(5-pentamethylcyclopentadienyl)(5-diphenylphosphino-25,26,27,28-tetra-*n*-propoxy-calix[4]arene)Rh(III), Cp*[Ph2P(calix)]RhCl2,** **3**. In a 100ml flask, 1.0g (1.3mmol) of **2** was placed under N2 in the presence of 0.4g (0.64mmol) of [Cp*RhCl2]2. Then 25ml of freshly distilled ethanol was added to the mixture. The solution was refluxed for 5 hrs and then allowed to cool down to room temperature. The solvent was then evaporated and the crude product was purified by column chromatography using a 30:70 ethylacetate/dichloromethane mixture. Red crystals suitable for crystallography were obtained from recrystallization in ethanol. Yield 1.19g (85%). H NMR (300MHz, CDCl3) 7.58 (br t, 4H, Ar-H), 7.37-7.00 (m, 8H, Ar-H), 6.76-6.66 (m, 4H, Ar-H), 6.55-6.41 (m, 5H, Ar-H), 4.47 (d, 2H, 2JH-H=13.19, CH2-Ar), 4.43 (d, 2H, 2JH-H=14.42, CH2-Ar), 3.91-3.78 (m, 8H, CH2O), 3.19 (d, 2H, 2JH-H=13.20, CH2-Ar), 3.09 (d, 2H, 2JH-H=13.12, CH2-Ar), 2.00-1.86 (m, 8H, CH2CH3), 1.30 and 1.29 (2s, 15H, CH3-Cp), 1.03-0.95 (m, 12H, CH2-CH3). C NMR (CD2Cl2) 171.14, 158.87, 156.88, 156.58, 136.01, 134.98, 131.44, 130.10, 128.72, 128.58, 128.41, 127.87, 122.83, 122.24, 99.27, 77.85, 77.48, 77.10, 60.56, 31.21, 24.10, 23.73, 23.50, 10.59, 10.35, 8.74. P NMR (CDCl3) 29.95 (d, 1JP-Rh=137). m/z (FAB+) 1085 (M+). Calc. for C62H72O4PCl2Rh: C, 68.57; H, 6.68. Found: C, 67.35; H, 6.89.

**Dihydrido(5-pentamethylcyclopentadienyl)(5-diphenylphosphino-25,26,27,28-tetra-*n*-propoxy-calix[4]arene)Rh(III), Cp*[Ph2P(calix)]RhH2, 4**. The complete procedure was performed in the dark and under N2. In a 100ml schlenk flask, 0.05g (0.046mmol) of **3** was dissolved in 5ml of freshly distilled ethanol. The solution was then refluxed for a few minutes, and then 0.025g (0.66mmol) of NaBH4 was quickly added via a 3ml suspension in dry ethanol. The reaction was then stirred for 1h and the volatiles were removed *in vacuo* at room temperature. Then the crude product was redissolved in a minimum of benzene, filtered and reevaporated, also under vacuum at room temperature. Compound **4** was obtained in quantitative yield (95%) as a red solid and was spectroscopically pure according to the 1H NMR and 31P NMR spectra. H NMR (300MHz, C6D6) 7.71-7.64 (m, 4H, Ar-H), 7.18-7.10 (m, 8H, Ar-H), 6.90 (d, 2H, 3JH-H=7.46, Ar-H), 6.85-6.51 (m, 7H, Ar-H), 4.55 (d, 2H, 2JH-H=13.12, CH2-Ar), 4.43 (d, 2H, 2JH-H=12.66, CH2-Ar), 3.87-3.78 (m, 8H, CH2O), 3.17 (d, 2H, 2JH-H=12.76, CH2-Ar), 3.01 (d, 2H, 2JH-H=13.05, CH2-Ar), 1.95 (s, 15H, CH3-Cp), 1.95-1.74 (m, 8H, CH2-CH3), 0.94-0.86 (m, 12H, CH2-CH3), -13.07 (dd, 2H, 2JH-P=38, 1JH-Rh=28, Rh-H). P NMR (C6D6) 30.49 (d, 1JP-Rh=145). IR (C6D6) Rh-H 2080 cm-1.

**(5-pentamethylcyclopentadienyl)carbonyl(5-diphenylphosphino-25,26,27,28-tetra-*n*-propoxy-calix[4]arene)Rh(I), Cp*[Ph2P(calix)]RhCO, 5.** 11.4mg (0.039mmol) of Cp*RhCO2 and 30.0mg (0.039mmol) of 2 were dissolved in 10ml of dry methylcyclohexane in the dark under N2 atmosphere. The solution was then refluxed for 24hrs and the volatiles were removed *in vacuo* at room temperature. The red solid was purified in the dark from column chromatography using silaned silice gel and 25:75 THF/hexane mixture. Yield 0.032g (80%). H NMR (300MHz, C6D6) 7.75-7.60 (m, 2H, Ar-H), 7.25 (d, 2H, 3JH-H=10.71, Ar-H), 7.20-7.05 (m, 8H, Ar-H), 6.85-6.70 (m, 5H, Ar-H), 6.58 (t, 2H, 3JH-H=7.57, Ar-H), 6.51 (dd, 2H, 3JH-H=7.57 and 1.14, Ar-H), 4.52 (d, 2H, 2JH-H=12.99, CH2-Ar), 4.45 (d, 2H, 2JH-H=13.1, CH2-Ar), 3.95-3.75 (m, 8H, CH2O), 3.15 (d, 2H, 2JH-H=13.20, CH2-Ar), 3.06 (d, 2H, 2JH-H=13.10, CH2-Ar), 1.85 and 1.84 (s+s, 15H, CH3-Cp), 2.00-1.70 (m, 8H, CH2-CH3), 0.95-0.80 (m, 12H, CH2-CH3). P NMR (C6D6) 52.81 (d, 1JP-Rh=199). m/z (FAB+) 1043 (M+). IR (C6D6) Rh-CO 1975 cm-1.
